# Supplementary material for: The Differential Effect of Carbon Dots on Gene Expression and DNA Methylation of Human Embryonic Lung Fibroblasts as a Function of Surface Charge and Dose
Source: MDPI journal article supplement (doi:10.3390/ijms21134763), 2020-07-04
Supplement: s1 [file s1]

Pathways deregulated after pCD and nCD exposure identified based on miRNA-mRNA interactions

| ID       | Pathway name                                               | pCD24h10 | pCD24h50 | nCD4h10 | nCD4h100 | nCD24h10 | nCD24h100 |
|----------|------------------------------------------------------------|----------|----------|---------|----------|----------|-----------|
| hsa00512 | Mucin type O-Glycan biosynthesis                           | X        | X        | X       | X        | X        | X         |
| hsa04261 | Adrenergic signaling in cardiomyocytes                     | X        | X        |         | X        | X        | X         |
| hsa04921 | Oxytocin signaling pathway                                 | X        | X        |         | X        | X        | X         |
| hsa05214 | Glioma                                                     | X        | X        |         | X        | X        | X         |
| hsa05032 | Morphine addiction                                         | X        | X        |         | X        | X        | X         |
| hsa05210 | Colorectal cancer                                          | X        | X        |         | X        | X        | X         |
| hsa05205 | Proteoglycans in cancer                                    | X        | X        |         | X        | X        | X         |
| hsa05212 | Pancreatic cancer                                          | X        | X        |         | X        | X        | X         |
| hsa04724 | Glutamatergic synapse                                      | X        | X        |         | X        | X        | X         |
| hsa05213 | Endometrial cancer                                         | X        | X        |         | X        | X        | X         |
| hsa04068 | FoxO signaling pathway                                     | X        | X        |         | X        | X        | X         |
| hsa04360 | Axon guidance                                              |          | X        | X       | X        | X        | X         |
| hsa04024 | cAMP signaling pathway                                     | X        | X        |         | X        |          | X         |
| hsa04730 | Long-term depression                                       | X        | X        |         | X        |          | X         |
| hsa05202 | Transcriptional misregulation in cancer                    |          | X        | X       | X        |          | X         |
| hsa04810 | Regulation of actin cytoskeleton                           |          | X        | X       | X        | X        | X         |
| hsa04150 | mTOR signaling pathway                                     |          | X        |         | X        | X        | X         |
| hsa04919 | Thyroid hormone signaling pathway                          |          | X        |         | X        | X        | X         |
| hsa05221 | Acute myeloid leukemia                                     |          | X        |         | X        | X        | X         |
| hsa04015 | Rap1 signaling pathway                                     |          | X        |         | X        | X        | X         |
| hsa04310 | Wnt signaling pathway                                      |          | X        |         | X        | X        | X         |
| hsa04152 | AMPK signaling pathway                                     |          | X        |         | X        | X        | X         |
| hsa05215 | Prostate cancer                                            |          | X        |         | X        | X        | X         |
| hsa04151 | PI3K-Akt signaling pathway                                 |          | X        |         | X        | X        | X         |
| hsa05412 | Arrhythmogenic right ventricular cardiomyopathy (ARVC)     |          | X        |         | X        | X        | X         |
| hsa04510 | Focal adhesion                                             |          | X        |         | X        | X        | X         |
| hsa04012 | ErbB signaling pathway                                     |          | X        |         | X        | X        | X         |
| hsa04350 | TGF-beta signaling pathway                                 |          | X        |         | X        | X        | X         |
| hsa05200 | Pathways in cancer                                         |          | X        |         | X        | X        | X         |
| hsa04014 | Ras signaling pathway                                      |          | X        |         | X        | X        | X         |
| hsa05211 | Renal cell carcinoma                                       |          | X        |         | X        | X        | X         |
| hsa04390 | Hippo signaling pathway                                    |          | X        |         | X        | X        | X         |
| hsa05220 | Chronic myeloid leukemia                                   |          | X        |         | X        | X        | X         |
| hsa04550 | Signaling pathways regulating pluripotency of stem cells   |          | X        |         | X        | X        | X         |
| hsa04010 | MAPK signaling pathway                                     |          | X        |         | X        | X        | X         |
| hsa05218 | Melanoma                                                   |          | X        |         | X        | X        | X         |
| hsa04320 | Dorso-ventral axis formation                               |          | X        |         | X        | X        | X         |
| hsa04520 | Adherens junction                                          |          | X        |         | X        | X        | X         |
| hsa04144 | Endocytosis                                                |          | X        |         | X        | X        | X         |
| hsa00310 | Lysine degradation                                         |          |          | X       | X        | X        | X         |
| hsa04512 | ECM-receptor interaction                                   |          | X        | X       | X        | X        | X         |
| hsa05161 | Hepatitis B                                                | X        |          |         |          | X        | X         |
| hsa04066 | HIF-1 signaling pathway                                    |          | X        |         | X        | X        | X         |
| hsa00061 | Fatty acid biosynthesis                                    |          | X        |         | X        |          | X         |
| hsa04710 | Circadian rhythm                                           |          | X        |         | X        |          | X         |
| hsa04070 | Phosphatidylinositol signaling system                      |          | X        |         | X        |          | X         |
| hsa04141 | Protein processing in endoplasmic reticulum                |          | X        |         | X        |          | X         |
| hsa04917 | Prolactin signaling pathway                                |          | X        |         | X        |          | X         |
| hsa03015 | mRNA surveillance pathway                                  |          | X        |         | X        |          | X         |
| hsa04713 | Circadian entrainment                                      |          | X        |         | X        |          | X         |
| hsa05217 | Basal cell carcinoma                                       |          | X        |         | X        |          | X         |
| hsa04071 | Sphingolipid signaling pathway                             |          | X        |         |          | X        | X         |
| hsa04915 | Estrogen signaling pathway                                 |          |          |         |          | X        | X         |
| hsa05020 | Prion diseases                                             |          |          | X       |          | X        | X         |
| hsa05231 | Choline metabolism in cancer                               |          |          |         | X        | X        | X         |
| hsa00534 | Glycosaminoglycan biosynthesis - heparan sulfate / heparin |          |          |         | X        | X        | X         |
| hsa04722 | Neurotrophin signaling pathway                             |          |          |         | X        | X        | X         |
| hsa04514 | Cell adhesion molecules (CAMs)                             | X        | X        |         |          |          |           |
| hsa04723 | Retrograde endocannabinoid signaling                       | X        |          |         |          |          | X         |
| hsa04918 | Thyroid hormone synthesis                                  | X        |          |         |          |          | X         |
| hsa04340 | Hedgehog signaling pathway                                 |          | X        |         | X        |          |           |
| hsa04725 | Cholinergic synapse                                        |          | X        |         |          |          | X         |
| hsa05100 | Bacterial invasion of epithelial cells                     |          | X        |         |          |          | X         |
| hsa04660 | T cell receptor signaling pathway                          |          | X        |         |          |          | X         |
| hsa04666 | Fc gamma R-mediated phagocytosis                           |          | X        |         |          |          | X         |
| hsa04728 | Dopaminergic synapse                                       |          | X        |         |          |          | X         |
| hsa00780 | Biotin metabolism                                          |          |          | X       | X        |          |           |
| hsa04115 | p53 signaling pathway                                      |          |          | X       | X        | X        |           |
| hsa00514 | Other types of O-glycan biosynthesis                       |          |          |         | X        |          | X         |
| hsa04540 | Gap junction                                               |          |          |         | X        |          | X         |
| hsa00533 | Glycosaminoglycan biosynthesis - keratan sulfate           |          |          |         | X        |          | X         |
| hsa00604 | Glycosphingolipid biosynthesis - ganglio series            |          |          |         | X        |          | X         |
| hsa04611 | Platelet activation                                        |          |          |         | X        |          | X         |
| hsa05223 | Non-small cell lung cancer                                 |          |          |         |          | X        | X         |
| hsa05203 | Viral carcinogenesis                                       |          |          |         |          | X        | X         |
| hsa04720 | Long-term potentiation                                     |          |          |         |          | X        | X         |
| hsa04530 | Tight junction                                             |          | X        |         |          |          |           |
| hsa05131 | Shigellosis                                                |          | X        |         |          |          |           |
| hsa01212 | Fatty acid metabolism                                      |          |          |         | X        |          |           |
| hsa04920 | Adipocytokine signaling pathway                            |          |          |         | X        |          |           |
| hsa04120 | Ubiquitin mediated proteolysis                             |          |          |         |          | X        |           |
| hsa05222 | Small cell lung cancer                                     |          |          |         |          | X        |           |
| hsa04370 | VEGF signaling pathway                                     |          |          |         |          | X        |           |
| hsa05166 | HTLV-I infection                                           |          |          |         |          | X        |           |
| hsa01040 | Biosynthesis of unsaturated fatty acids                    |          |          |         |          | X        |           |
| hsa05162 | Measles                                                    |          |          |         |          |          | X         |
| hsa04910 | Insulin signaling pathway                                  |          |          |         |          |          | X         |
| hsa05031 | Amphetamine addiction                                      |          |          |         |          |          | X         |
| hsa04022 | cGMP-PKG signaling pathway                                 |          |          |         |          |          | X         |
| hsa00562 | Inositol phosphate metabolism                              |          |          |         |          |          | X         |
| hsa04750 | Inflammatory mediator regulation of TRP channels           |          |          |         |          |          | X         |
| hsa05230 | Central carbon metabolism in cancer                        |          |          |         |          |          | X         |
| hsa05033 | Nicotine addiction                                         |          |          |         |          |          | X         |
| hsa00510 | N-Glycan biosynthesis                                      |          |          |         |          |          | X         |
| hsa04930 | Type II diabetes mellitus                                  |          |          |         |          |          | X         |
| hsa04210 | Apoptosis                                                  |          |          |         |          |          | X         |
| hsa04668 | TNF signaling pathway                                      |          |          |         |          |          | X         |
| hsa00250 | Alanine, aspartate and glutamate metabolism                |          |          |         |          |          | X         |
| hsa05160 | Hepatitis C                                                |          |          |         |          |          | X         |
| hsa04960 | Aldosterone-regulated sodium reabsorption                  |          |          |         |          |          | X         |
| hsa04727 | GABAergic synapse                                          |          |          |         |          |          | X         |
