# Supplementary material for: The Differential Effect of Carbon Dots on Gene Expression and DNA Methylation of Human Embryonic Lung Fibroblasts as a Function of Surface Charge and Dose
Source: MDPI journal article supplement (doi:10.3390/ijms21134763), 2020-07-04
Supplement: s1 [file s1]

Pathways deregulated after pCD and nCD exposure

| ID        | Source       | Pathway name                                                                                           | pCD24h50 | nCD4h100 | nCD24h10 | nCD24h100 |
|-----------|--------------|--------------------------------------------------------------------------------------------------------|----------|----------|----------|-----------|
| 1269519   | REACTOME     | RHO GTPases Activate Formins                                                                           | X        |          | X        | X         |
| 1269741   | REACTOME     | Cell Cycle                                                                                             | X        |          | X        | X         |
| 138007    | Path Int Dat | PLK1 signaling events                                                                                  | X        |          | X        | X         |
| 1269773   | REACTOME     | Activation of the pre-replicative complex                                                              | X        |          | X        | X         |
| 1269763   | REACTOME     | Cell Cycle, Mitotic                                                                                    | X        |          | X        | X         |
| 1269810   | REACTOME     | M Phase                                                                                                | X        |          | X        | X         |
| 1269785   | REACTOME     | Unwinding of DNA                                                                                       | X        |          | X        | X         |
| 1269821   | REACTOME     | Resolution of Sister Chromatid Cohesion                                                                | X        |          | X        | X         |
| 1269768   | REACTOME     | G1/S Transition                                                                                        | X        |          | X        | X         |
| 1269772   | REACTOME     | G1/S-Specific Transcription                                                                            | X        |          | X        | X         |
| 137934    | Path Int Dat | E2F transcription factor network                                                                       | X        |          | X        | X         |
| 1269820   | REACTOME     | Mitotic Prometaphase                                                                                   | X        |          | X        | X         |
| 1269784   | REACTOME     | DNA strand elongation                                                                                  | X        |          | X        | X         |
| 1269823   | REACTOME     | Mitotic Metaphase and Anaphase                                                                         | X        |          | X        | X         |
| 83054     | KEGG         | Cell cycle                                                                                             | X        |          | X        | X         |
| 1269742   | REACTOME     | Cell Cycle Checkpoints                                                                                 | X        |          | X        | X         |
| 138080    | Path Int Dat | Aurora B signaling                                                                                     | X        |          | X        | X         |
| 1269777   | REACTOME     | S Phase                                                                                                | X        |          | X        | X         |
| 1269779   | REACTOME     | Synthesis of DNA                                                                                       | X        |          | X        | X         |
| 1269875   | REACTOME     | DNA Replication                                                                                        | X        |          | X        | X         |
| 83039     | KEGG         | DNA Replication                                                                                        | X        |          | X        | X         |
| 1269825   | REACTOME     | Mitotic Anaphase                                                                                       | X        |          | X        | X         |
| 1269764   | REACTOME     | Mitotic G1-G1/S phases                                                                                 | X        |          | X        | X         |
| 1269831   | REACTOME     | M/G1 Transition                                                                                        | X        |          | X        | X         |
| 1269509   | REACTOME     | RHO GTPase Effectors                                                                                   | X        |          | X        | X         |
| 1269832   | REACTOME     | DNA Replication Pre-Initiation                                                                         | X        |          | X        | X         |
| 1269826   | REACTOME     | Separation of Sister Chromatids                                                                        | X        |          | X        | X         |
| 1269507   | REACTOME     | Signaling by Rho GTPases                                                                               | X        |          | X        | X         |
| 1268690   | REACTOME     | Eukaryotic Translation Elongation                                                                      |          | X        |          | X         |
| 1269056   | REACTOME     | Infectious disease                                                                                     |          | X        |          | X         |
| 1268689   | REACTOME     | SRP-dependent cotranslational protein targeting to membrane                                            |          | X        |          | X         |
| 1269718   | REACTOME     | Nonsense Mediated Decay (NMD) independent of the Exon Junction Complex (EJC)                           |          | X        |          | X         |
| 1268686   | REACTOME     | GTP hydrolysis and joining of the 60S ribosomal subunit                                                |          | X        |          | X         |
| 1268681   | REACTOME     | Formation of a pool of free 40S subunits                                                               |          | X        |          | X         |
| 1269109   | REACTOME     | Influenza Life Cycle                                                                                   |          | X        |          | X         |
| 1339156   | REACTOME     | Selenocysteine synthesis                                                                               |          | X        |          | X         |
| 1339149   | REACTOME     | Selenoamino acid metabolism                                                                            |          | X        |          | X         |
| 1268691   | REACTOME     | Peptide chain elongation                                                                               |          | X        |          | X         |
| 1269120   | REACTOME     | Viral mRNA Translation                                                                                 |          | X        |          | X         |
| 1268688   | REACTOME     | L13a-mediated translational silencing of Ceruloplasmin expression                                      |          | X        |          | X         |
| 1269115   | REACTOME     | Influenza Viral RNA Transcription and Replication                                                      |          | X        |          | X         |
| 1268679   | REACTOME     | Eukaryotic Translation Initiation                                                                      |          | X        |          | X         |
| 1268692   | REACTOME     | Eukaryotic Translation Termination                                                                     |          | X        |          | X         |
| 1269108   | REACTOME     | Influenza Infection                                                                                    |          | X        |          | X         |
| 1268680   | REACTOME     | Cap-dependent Translation Initiation                                                                   |          | X        |          | X         |
| 1269765   | REACTOME     | G0 and Early G1                                                                                        | X        |          | X        |           |
| 1269799   | REACTOME     | G2/M Transition                                                                                        | X        |          | X        |           |
| 1269804   | REACTOME     | Polo-like kinase mediated events                                                                       | X        |          | X        |           |
| 1269797   | REACTOME     | Mitotic G2-G2/M phases                                                                                 | X        |          | X        |           |
| M17370    | MSigDB C2    | Role of Ran in mitotic spindle regulation                                                              | X        |          | X        |           |
| 1269800   | REACTOME     | Cyclin A/B1 associated events during G2/M transition                                                   | X        |          | X        |           |
| M6682     | MSigDB C2    | CDK Regulation of DNA Replication                                                                      | X        |          | X        |           |
| 137925    | Path Int Dat | Aurora A signaling                                                                                     | X        |          | X        |           |
| 1269757   | REACTOME     | Activation of ATR in response to replication stress                                                    | X        |          |          | X         |
| 1269753   | REACTOME     | G2/M Checkpoints                                                                                       | X        |          |          | X         |
| 1269774   | REACTOME     | E2F mediated regulation of DNA replication                                                             | X        |          | X        |           |
| 1339113   | REACTOME     | SUMOylation of DNA replication proteins                                                                | X        |          |          |           |
| 1269817   | REACTOME     | Nuclear Pore Complex (NPC) Disassembly                                                                 | X        |          |          |           |
| 1269815   | REACTOME     | Nuclear Envelope Breakdown                                                                             | X        |          |          |           |
| 1269085   | REACTOME     | Rev-mediated nuclear export of HIV RNA                                                                 | X        |          |          |           |
| 1268743   | REACTOME     | SUMO E3 ligases SUMOylate target proteins                                                              | X        |          |          |           |
| 1269095   | REACTOME     | Interactions of Rev with host cellular proteins                                                        | X        |          |          |           |
| 1270037   | REACTOME     | Cholesterol biosynthesis                                                                               | X        |          |          |           |
| SMP00023  | SMPDB        | Steroid Biosynthesis                                                                                   | X        |          |          |           |
| 142269    | BIOCYC       | superpathway of cholesterol biosynthesis                                                               | X        |          |          |           |
| PW-000454 | Ontology     | cholesterol biosynthetic                                                                               | X        |          |          |           |
| 1309095   | REACTOME     | DNA Double-Strand Break Repair                                                                         | X        |          |          |           |
| 1269688   | REACTOME     | Processing of Capped Intron-Containing Pre-mRNA                                                        |          | X        |          |           |
| 1269654   | REACTOME     | Transcriptional Regulation by TP53                                                                     |          | X        |          |           |
| 138045    | Path Int Dat | HIF-1-alpha transcription factor network                                                               |          | X        |          |           |
| 1269691   | REACTOME     | mRNA Splicing - Minor Pathway                                                                          |          | X        |          |           |
| 138057    | Path Int Dat | ErbB1 downstream signaling                                                                             |          | X        |          |           |
| 1268855   | REACTOME     | Diseases of signal transduction                                                                        |          | X        |          |           |
| 1269717   | REACTOME     | Nonsense Mediated Decay (NMD) enhanced by the Exon Junction Complex (EJC)                              |          | X        |          |           |
| 1270421   | REACTOME     | Cellular response to heat stress                                                                       |          | X        |          |           |
| 1269716   | REACTOME     | Nonsense-Mediated Decay (NMD)                                                                          |          | X        |          |           |
| 1268682   | REACTOME     | Formation of the ternary complex, and subsequently, the 43S complex                                    |          | X        |          |           |
| 1383086   | REACTOME     | Major pathway of rRNA processing in the nucleolus and cytosol                                          |          | X        |          |           |
| 1268684   | REACTOME     | Translation Initiation complex formation                                                               |          | X        |          |           |
| 1268685   | REACTOME     | Ribosomal scanning and start codon recognition                                                         |          | X        |          |           |
| 137957    | Path Int Dat | LKB1 signaling events                                                                                  |          | X        |          |           |
| 138001    | Path Int Dat | mTOR signaling pathway                                                                                 |          | X        |          |           |
| 1383085   | REACTOME     | rRNA processing                                                                                        |          | X        |          |           |
| 83100     | KEGG         | Huntington's disease                                                                                   |          | X        |          |           |
| 1269649   | REACTOME     | Gene Expression                                                                                        |          | X        |          |           |
| 1269443   | REACTOME     | Signalling by NGF                                                                                      |          | X        |          |           |
| 137940    | Path Int Dat | Signaling events mediated by VEGFR1 and VEGFR2                                                         |          | X        |          |           |
| 782000    | KEGG         | Proteoglycans in cancer                                                                                |          | X        |          |           |
| 83070     | KEGG         | Adherens junction                                                                                      |          | X        |          |           |
| 83105     | KEGG         | Pathways in cancer                                                                                     |          | X        |          |           |
| 1270158   | REACTOME     | Metabolism of amino acids and derivatives                                                              |          | X        |          |           |
| 1269655   | REACTOME     | TP53 Regulates Metabolic Genes                                                                         |          | X        |          |           |
| 1268683   | REACTOME     | Activation of the mRNA upon binding of the cap-binding complex and eIFs, and subsequent binding to 43S |          | X        |          |           |
| 1268677   | REACTOME     | Metabolism of proteins                                                                                 |          | X        |          |           |
| 1268678   | REACTOME     | Translation                                                                                            |          | X        |          |           |
| 83036     | KEGG         | Ribosome                                                                                               |          | X        |          |           |
| 946598    | KEGG         | Thyroid hormone signaling pathway                                                                      |          | X        |          |           |
| 1268854   | REACTOME     | Disease                                                                                                |          | X        |          |           |
| 1427846   | REACTOME     | rRNA processing in the nucleus and cytosol                                                             |          | X        |          |           |
| 1270303   | REACTOME     | Axon guidance                                                                                          |          | X        |          |           |
| 1269376   | REACTOME     | Basigin interactions                                                                                   |          |          | X        |           |
| 83055     | KEGG         | p53 signaling pathway                                                                                  |          |          | X        |           |
| 1269709   | REACTOME     | tRNA Aminoacylation                                                                                    |          |          | X        |           |
| 1269514   | REACTOME     | RHO GTPases activate CIT                                                                               |          |          | X        |           |
| 1269838   | REACTOME     | APC/C-mediated degradation of cell cycle proteins                                                      |          |          | X        |           |
| 1383071   | REACTOME     | TP53 Regulates Transcription of Cell Cycle Genes                                                       |          |          | X        |           |
| 1269710   | REACTOME     | Cytosolic tRNA aminoacylation                                                                          |          |          | X        |           |
| MAP00970  | GenMAPP      | MAP00970 Aminoacyl tRNA biosynthesis                                                                   |          |          | X        |           |
| 1269837   | REACTOME     | Regulation of mitotic cell cycle                                                                       |          |          | X        |           |
| 1269840   | REACTOME     | Phosphorylation of Emi1                                                                                |          |          | X        |           |
| 1270244   | REACTOME     | Extracellular matrix organization                                                                      |          |          | X        |           |
| 1269796   | REACTOME     | Removal of licensing factors from origins                                                              |          |          | X        |           |
| 137935    | Path Int Dat | FOXM1 transcription factor network                                                                     |          |          | X        |           |
| 1269859   | REACTOME     | Telomere C-strand (Lagging Strand) Synthesis                                                           |          |          |          | X         |
| 1269853   | REACTOME     | Chromosome Maintenance                                                                                 |          |          |          | X         |
| 1270350   | REACTOME     | DNA Repair                                                                                             |          |          |          | X         |
