# Supplementary material for: The Differential Effect of Carbon Dots on Gene Expression and DNA Methylation of Human Embryonic Lung Fibroblasts as a Function of Surface Charge and Dose
Source: MDPI journal article supplement (doi:10.3390/ijms21134763), 2020-07-04

TEM images of nCD (left) and pCD (right)

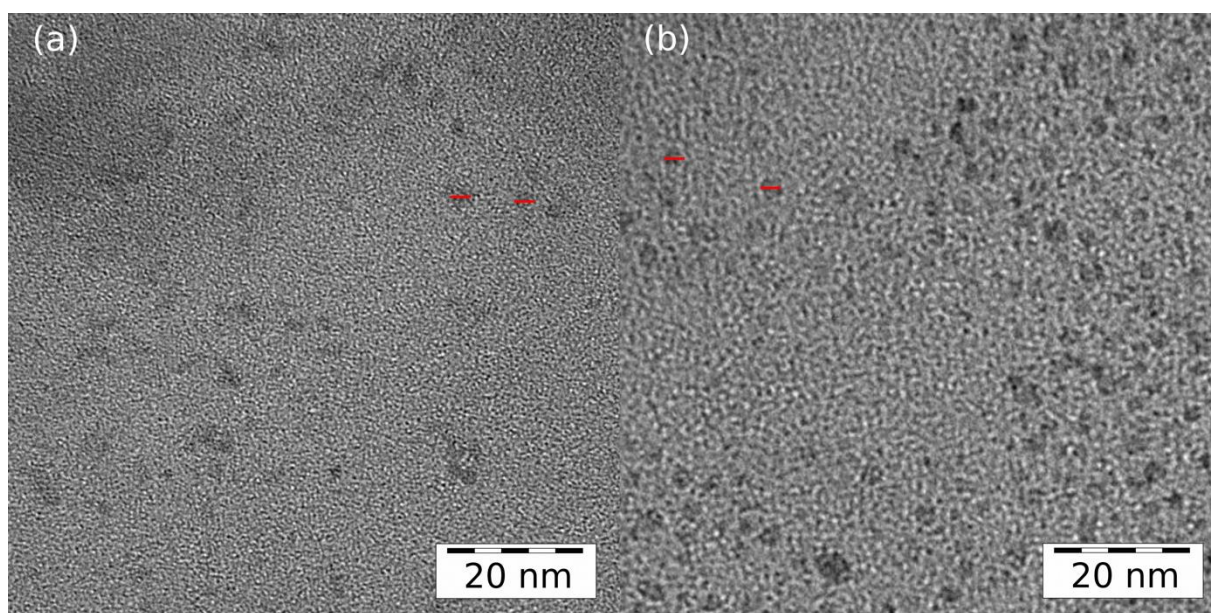

DLS measurement of hydrodynamic diameters for nCD (red) and pCD (green)

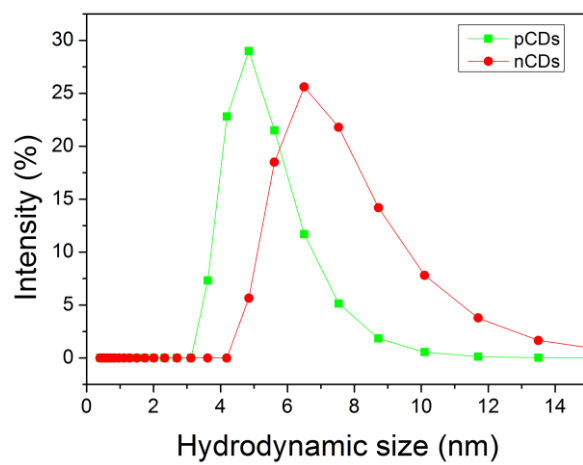

Supplement: s1 [file s1]
