# Supplementary material for: The Differential Effect of Carbon Dots on Gene Expression and DNA Methylation of Human Embryonic Lung Fibroblasts as a Function of Surface Charge and Dose
Source: MDPI journal article supplement (doi:10.3390/ijms21134763), 2020-07-04

Confocal microscopy image of HEL12469 cells treated with 50  $\mu\text{g/ml}$  of (A) nCD and (B) pCD. From left to right: 4 layers of z plane with the step of 1  $\mu\text{m}$ .

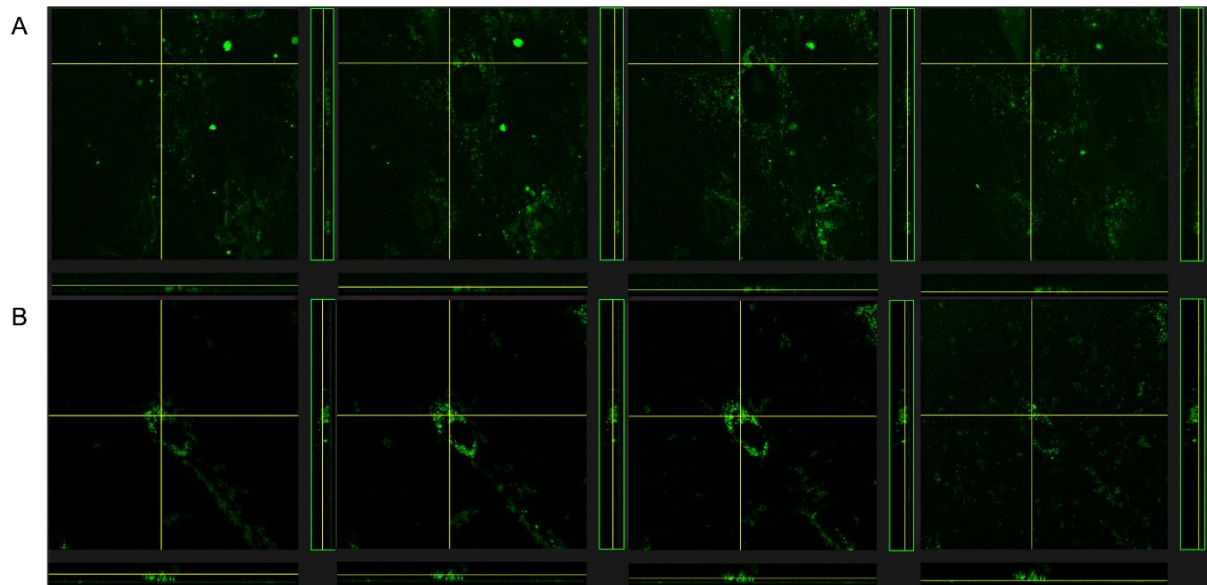

Supplement: s1 [file s1]
